# Supplementary material for: As a Novel Tumor Suppressor, LHPP Promotes Apoptosis by Inhibiting the PI3K/AKT Signaling Pathway in Oral Squamous Cell Carcinoma
Source: Int J Biol Sci. 2022 Jan 1;18(2):491–506. doi: 10.7150/ijbs.66841 (PMC8741864; doi:10.7150/ijbs.66841)
Supplement: Supplementary file 1 — Supplementary figures. [file ijbsv18p0491s1.pdf]

1

A

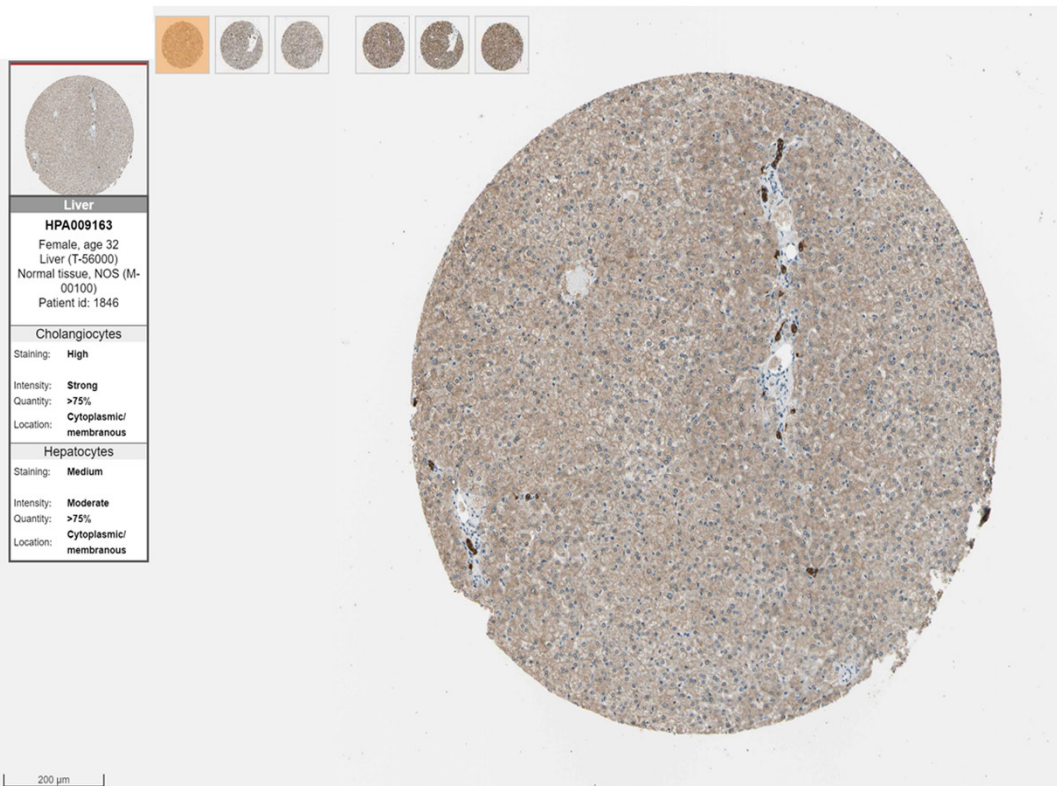

B

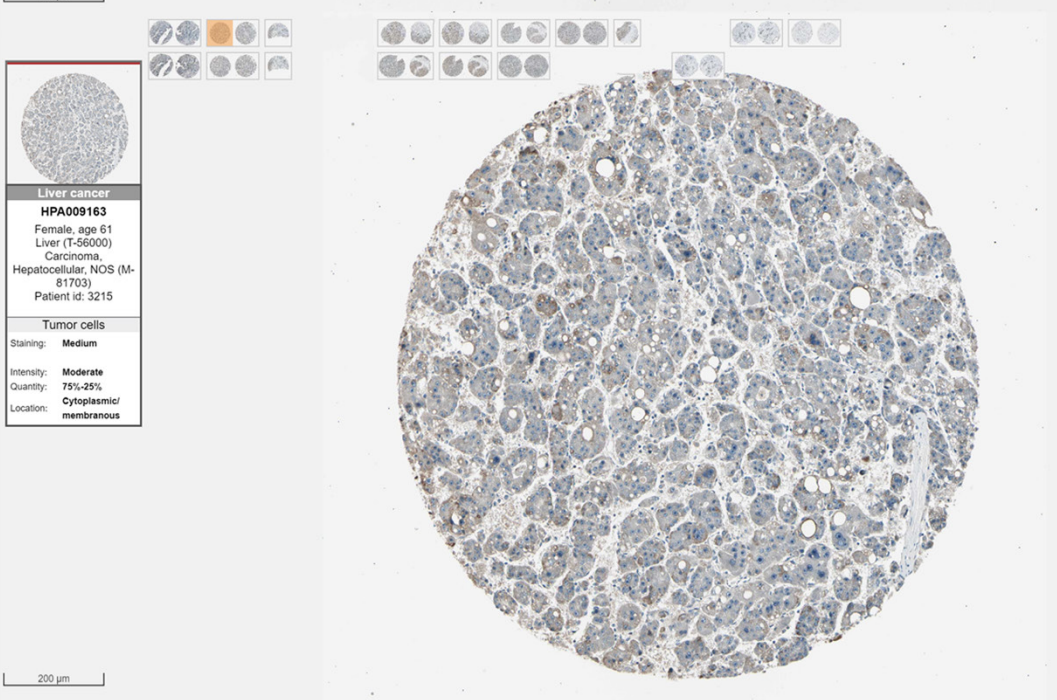

2

3 **Supplement 1.** (A, B) Representative images of LHPP IHC staining of normal liver tissues and liver cancer tissues from  
 4 The Human Protein Atlas (<http://www.proteinatlas.org/>).

5

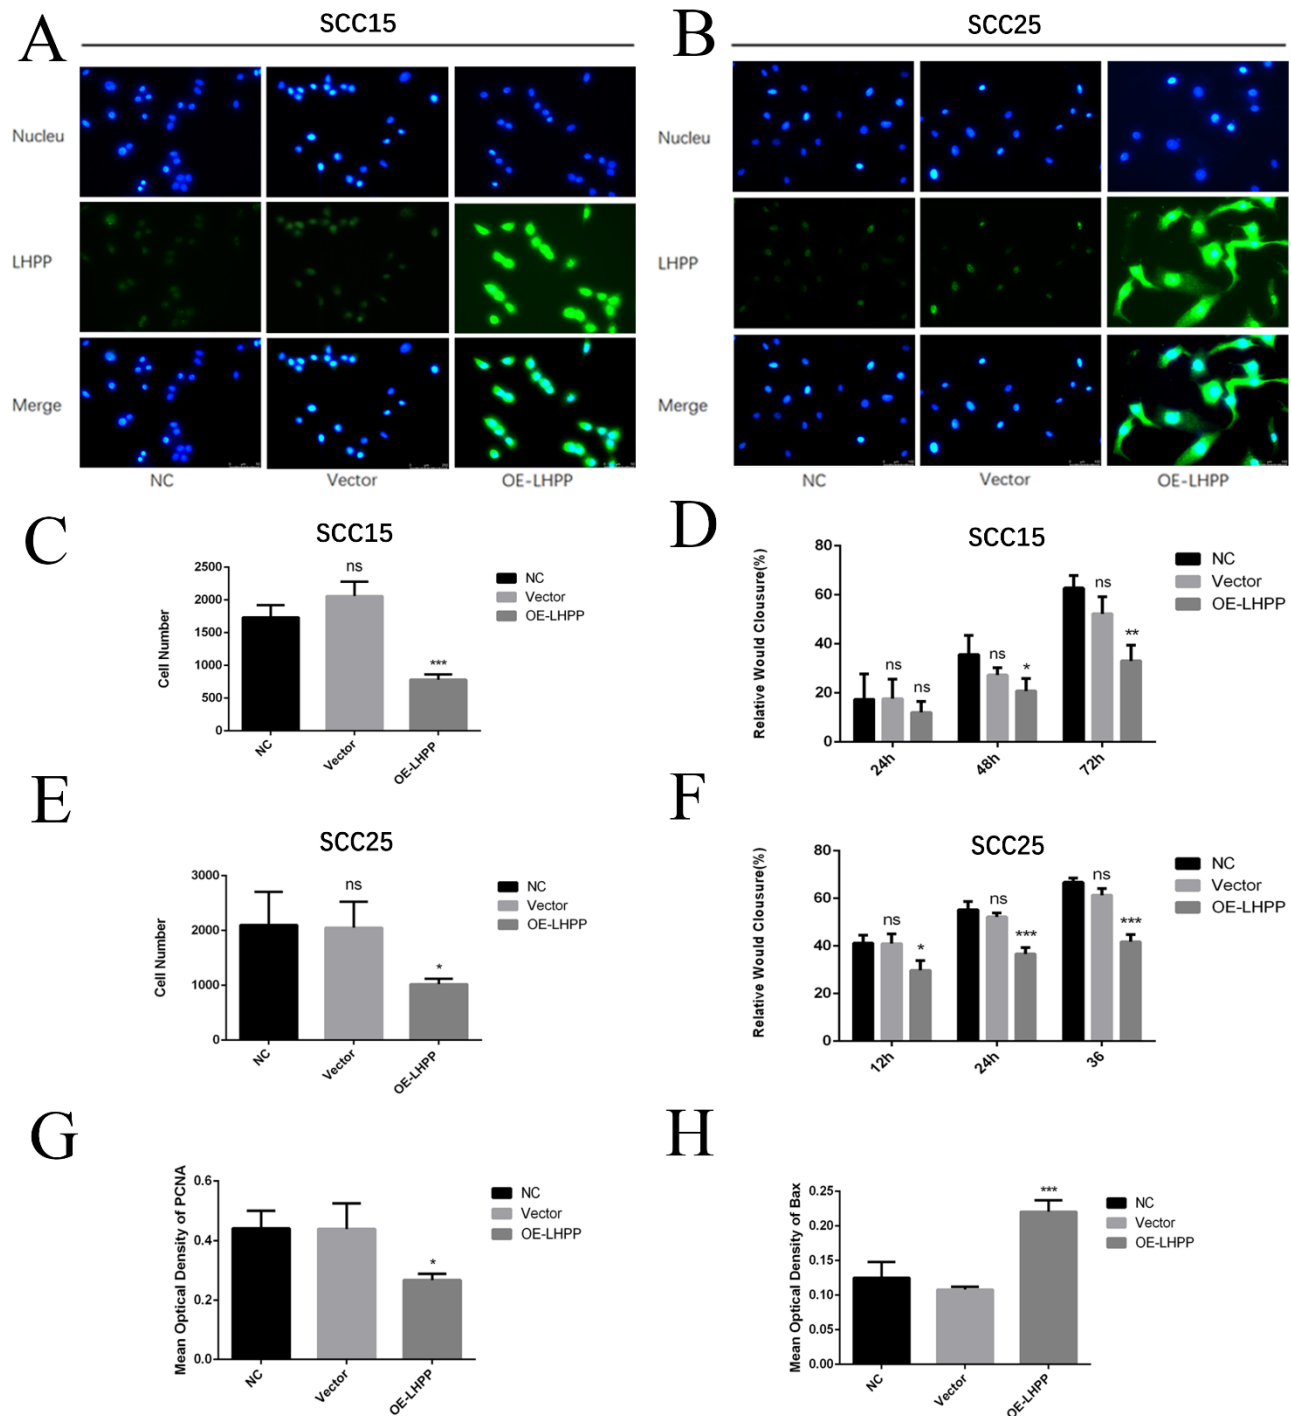

6 **Supplement 2.** (A, B) IFC staining of LHPP in NC, Vector and OE-LHPP group in SCC15 and SCC25 cell lines (400X).  
7 (C, E) The number of cells that passed through the membranes were counted using IPP6.0 software. (D, F) The statistical  
8 analysis of the relative wound closure in SCC15 and SCC25 cells. (G, H) MOD analysis of the PCNA and Bax  
9 expression in xenograft tumors. \* $p < 0.1$ , \*\* $p < 0.01$ , \*\*\* $p < 0.001$ .

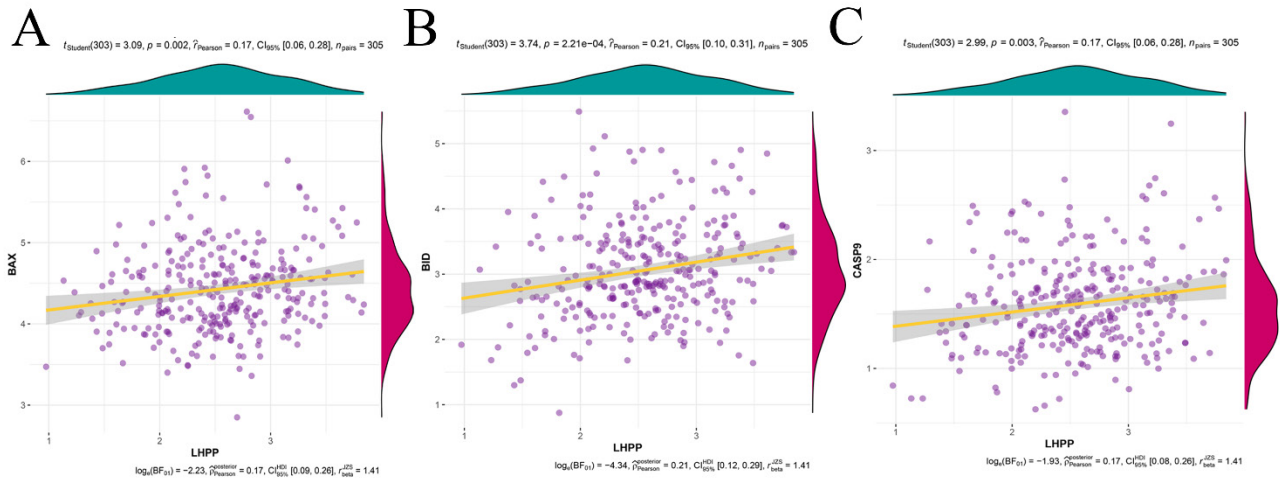

10  
11 **Supplement 3.** (A, B, C) The correlation between the expression of LHPP and apoptotic proteins in the TCGA dataset.
